# Supplementary material for: Unravelling the potential of l-carnosine analog-based nano-assemblies as pH-responsive therapeutics in treating glioma: an in vitro perspective
Source: Royal Society of Chemistry journal article supplement (doi:10.1039/d4tb01262c), 2024-01-01
Supplement: d4tb01262c1.pdf [file d4tb01262c1.pdf]

## Supplementary Data

### Unravelling the potential of L-carnosine analog-based nano-assemblies as pH-responsive therapeutics in glioma: an in-vitro perspective

Nidhi Aggarwal, Gurjot Singh, Himanshu Sekhar Panda, Jiban Jyoti Panda\*

Chemical Biology Unit, Institute of Nano Science and Technology, Sector-81, Mohali, Punjab  
140306, INDIA

\*Corresponding author:

Jiban Jyoti Panda- Chemical Biology Unit, Institute of Nano Science and Technology, Mohali,  
Punjab-140306, India; orchid.org/0000-00030350-7491; Email: [jyoti@inst.ac.in](mailto:jyoti@inst.ac.in)

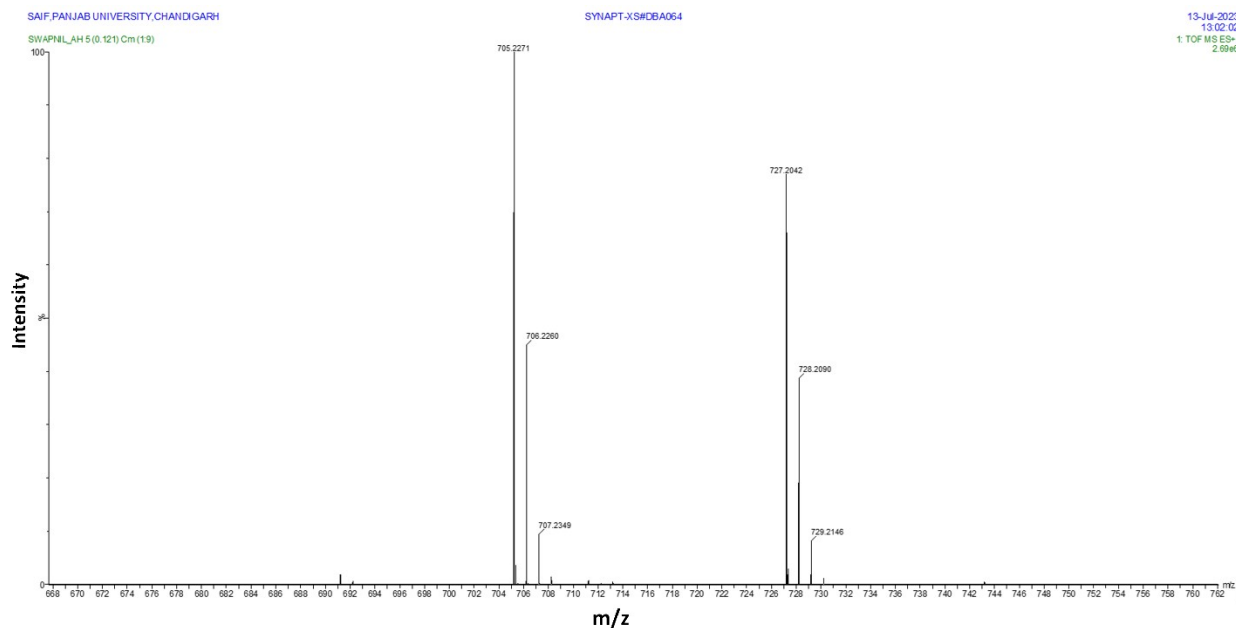

Figure S1: Confirmation of the synthesis of protected Ca was achieved by mass spectrometry. ESI MS (m/z):  $[M + H]^+$  expected mass for  $C_{44}H_{40}N_4O_5$  was 704.30 and the observed mass was 705.22.

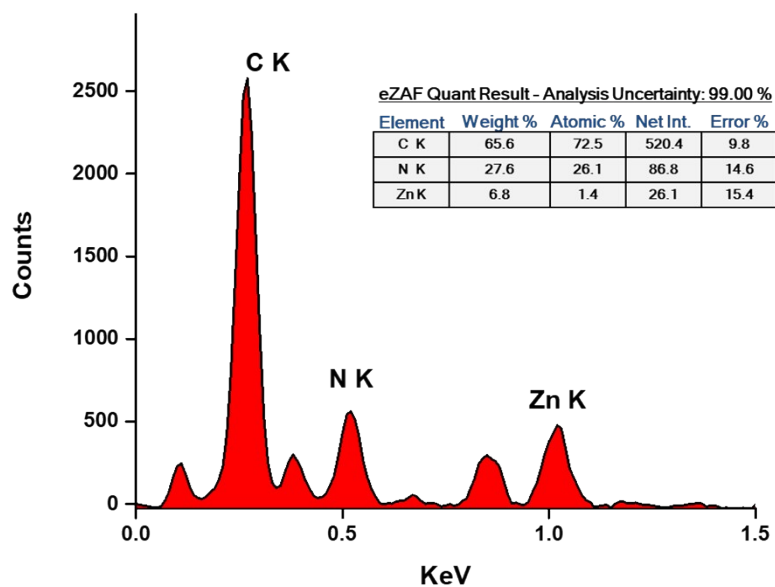

Figure S2: Elemental analysis performed using EDAX analysis that confirmed the presence of Zn in the co-assembled CaNPs. Weight % of Zn was observed to be 6.8 % in our CaNPs as calculated by using eZAF quant results.
